# Supplementary material
Source: PubMed Central journal article supplement (PMC3241773)
Supplement: 1112933108_pnas.201112933SI.pdf [file 1112933108_pnas.201112933SI.pdf]

# Supporting Information

Merchant et al. 10.1073/pnas.1112933108

## SI Text

**Calculation of Mutual Information.** Information theory has been an important mathematical tool to study how the spike train of a single neuron or a population of neurons transmits information about a behavioral parameter. The mutual information (MI) is a measure of the statistical dependency between the behavioral variable (i.e., produced interval,  $n = 12$ ) and a neurophysiological parameter (i.e., the single-trial ramp duration, slope,  $\tau$  value, etc. . . across the cell type population). Thus, the MI between the behavioral variable  $I$  and neurophysiological parameter  $r$  can be defined as:

$$MI(r, I) = \sum_{r, I} p(r, I) \log_2 \left( \frac{p(r, I)}{p(r)p(I)} \right)$$

1. Golomb D, Hertz J, Panzeri S, Treves A, Richmond B (1997) How well can we estimate the information carried in neuronal responses from limited samples? *Neural Comput* 9: 649–665.

where  $p(r, I)$  is the joint probability of  $r$  and  $I$ , and essentially tells us how much extra information one gets from the behavioral variable by knowing the outcomes of the neurophysiological parameter (1). The overall probability  $p(r)$  of observing the  $r$  value of the neurophysiological parameter was obtained by marginalization:  $p(r) = \sum_I p(r, I)$ . The  $p(I)$  for produced intervals was calculated from the behavior of the monkeys during the neural recordings (see Fig. S4).

The joint distribution  $p(r, I)$  was computed from a count matrix  $C(i, j)$ , in which each entry  $(i, j)$  is the number of times a  $j$  value of the ramp single trial parameter was observed for the interval duration  $i$ . Hence, the approximation:  $p(r, I) = \frac{c(i, j)}{\sum_i \sum_j c(i, j)}$ .

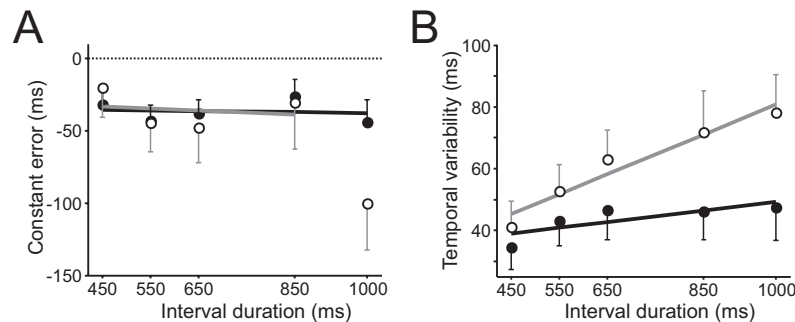

**Fig. S1.** Timing behavior of the monkeys. (A) Constant error (mean  $\pm$  SEM) as a function of target intervals for the synchronization (filled circles) and continuation (open circles) phases. The linear regression fits between the constant error and interval duration showed slopes close to zero and regression constants around 30 ms, with no significant differences between the synchronization and continuations phase (repeated measures ANOVAs, for slopes:  $F(1,772) = 2.84$ ,  $P = 0.092$ ; for regression constant:  $F(1,772) = 2.3$ ,  $P = 0.13$ ; see *Methods*). Hence, the monkeys were able to produce the target intervals with a small underestimation of around 35 ms across interval durations and task phases. The horizontal line at zero represents perfect accuracy. The straight lines correspond to the best linear fittings, however, for the continuation phase (gray line) the interval of 1000 ms was eliminated of the regression analysis. (B) Temporal variability (mean  $\pm$  SEM) increased as a function of the target intervals for both task phases, following the scalar property of interval timing (Gibbon et al., 1997). The straight lines correspond to the best linear fittings (black: synchronization; gray: continuation).



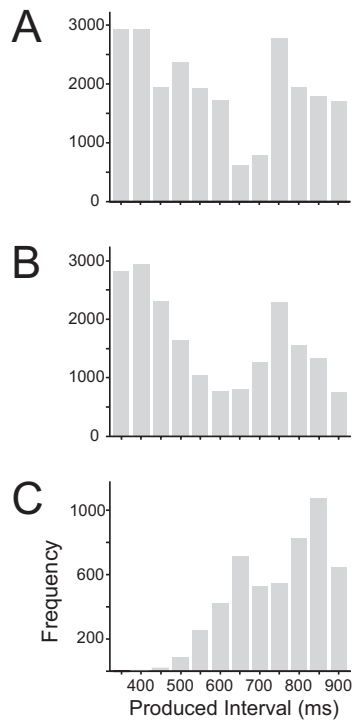

**Fig. S4.** Distributions of the duration of produced intervals during the synchronization (*A*) and continuation (*B*) phases of SCT, and during the SRTT (*C*) for both monkeys.



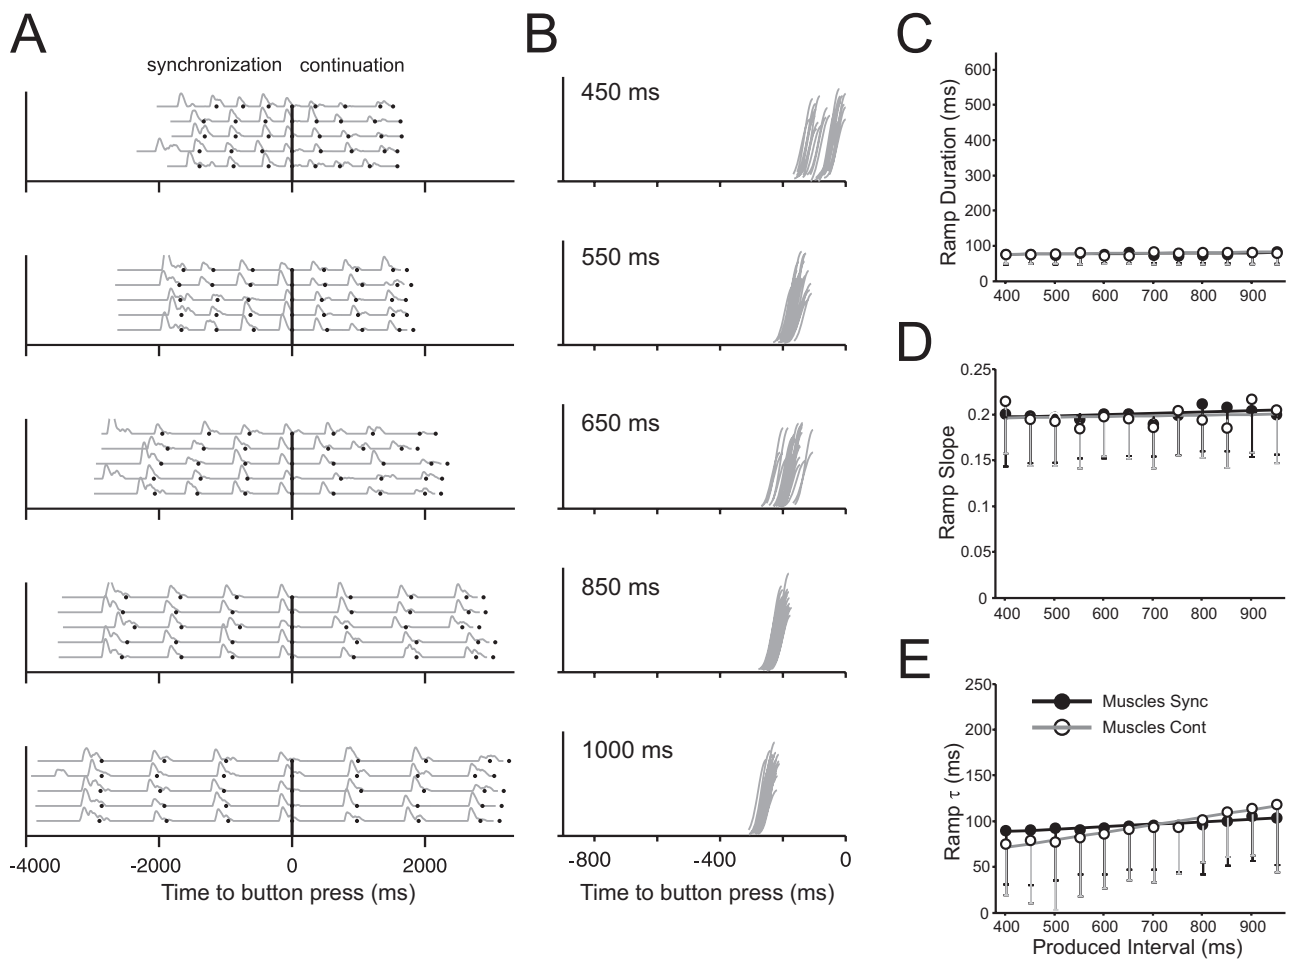

**Fig. 56.** (A) Raster plot for the EMG activity of the *triceps brachii* of monkey 2 during the SCT aligned to the first continuation tap. Same conventions of Fig. 2. (B) The corresponding ramps of the *triceps brachii* EMG detected by the iterative algorithm. Ramp duration (C), slope (D), and  $\tau$  value (E) as a function of the produced interval for the population of EMGs with significant ramping activity. The EMG was recorded in the same two monkeys in separate sessions from the neural recordings using intramuscular, multistranded, teflon-coated wire electrodes. EMG activity was recorded bilaterally in the following muscles for both monkeys: *triceps brachii*, *biceps brachii*, *deltoideus* (anterior, middle, and posterior), *extensor digitorum communis*, *extensor digitorum 2,3*, *flexor digitorum sublimis*, *rhomboideus major*, *trapezius*, *pectoralis major*, and *latissimus dorsi*.

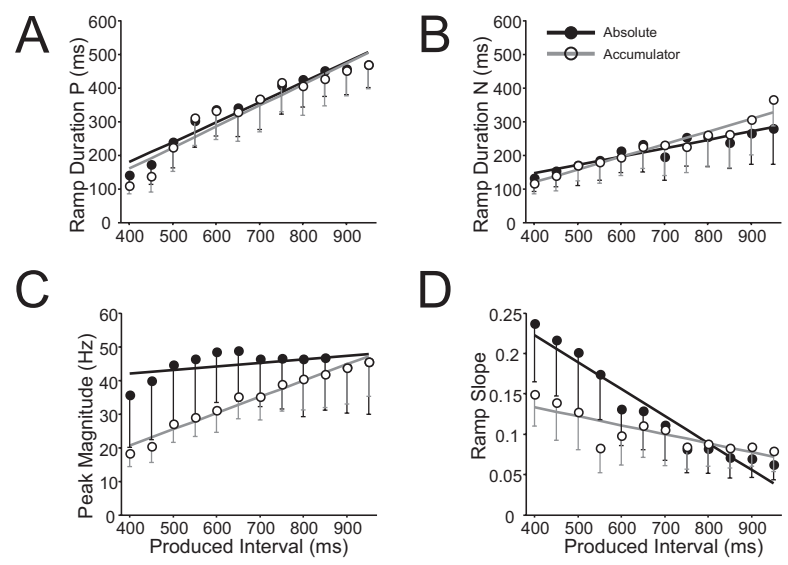

**Fig. 57.** Mean ( $\pm$  SEM) of the ramp duration for the positive ramp (A), the ramp duration for the negative ramp (B), the peak magnitude (C), and the slope of the positive ramp (D) as a function of produced interval, for absolute timing (filled circles, black line) and time-accumulator (open circles, gray line) cells.
